# Supplementary material for: Perceptions of research integrity climate differ between academic ranks and disciplinary fields: Results from a survey among academic researchers in Amsterdam
Source: PubMed Central journal article supplement (PMC6338411; doi:10.1371/journal.pone.0210599), 2019-01-18
Supplement: pone.0210599.s004.pdf [file pone.0210599.s004.pdf]

**Modification for current study**

How effectively do the available educational opportunities at your university teach staff/researchers about responsible research practices (e.g., lectures, seminars, web-based courses)?

How committed are the senior administrators at your university/medical centre/institution (e.g., deans, members of the executive board) to supporting responsible research?

How effectively do the senior administrators at your institution (e.g., deans, executive board) communicate high expectations for research integrity?

If you needed to report a case of suspected research misconduct, how confident are you that you would know where to turn?

How difficult is it to conduct research in a responsible manner because of insufficient access to human resources such as statistical expertise, technical support or administrative support?

How committed are supervisors in your department to talking with supervisees about key principles of research integrity?

How consistently do supervisors communicate to their supervisees clear performance (e.g. what is expected to earn authorship, proper citation and correct referencing)?

How consistently do research practices in your department follow established institutional policies regarding research?

How respectfully do supervisors treat supervisees?

How committed are people in your department to maintaining data integrity (appropriate handling of data from its collection to how its archived for potential future use) and data confidentiality?

How available are supervisors to their supervisees?
