# Supplementary material for: Perceptions of research integrity climate differ between academic ranks and disciplinary fields: Results from a survey among academic researchers in Amsterdam
Source: PubMed Central journal article supplement (PMC6338411; doi:10.1371/journal.pone.0210599), 2019-01-18
Supplement: pone.0210599.s005.pdf [file pone.0210599.s005.pdf]

| <b>SOuRCe Subscale (N)</b>                                                                                                                      | <b>VIF</b> | <b>Adjusted T score (df)</b> | <b>p value</b> | <b>Effect</b>                     |
|-------------------------------------------------------------------------------------------------------------------------------------------------|------------|------------------------------|----------------|-----------------------------------|
| Integrity Norms (1009)<br><i>β PhD vs. associate &amp; full prof.</i>                                                                           | 1.884      | 1.620 (531)                  | .106           | Association no longer significant |
| Integrity Socialization (1018)<br><i>β PhD vs. associate &amp; full prof.</i><br><i>β postdoc &amp; asis. vs. asso. &amp; full prof.</i>        | 1.354      | -5.209 (748)<br>-4.454 (748) | <.001<br><.001 | No effect on association          |
| Integrity Inhibitors (1020)<br><i>β PhD vs. associate &amp; full prof.</i><br><i>β postdoc &amp; asis. vs. asso. &amp; full prof.</i>           | 6.049      | -1.259 (165)<br>-.0897 (165) | .210<br>.371   | Association no longer significant |
| RCR Resources (985)<br><i>β PhD vs. associate &amp; full prof.</i><br><i>β postdoc &amp; asis. vs. asso. &amp; full prof.</i>                   | 2.175      | -2.576 (446)<br>-2.934 (446) | .011<br>.003   | No effect on association          |
| Expectations (1011)<br><i>β PhD vs. associate &amp; full prof.</i><br><i>β postdoc &amp; asis. vs. asso. &amp; full prof.</i>                   | 1.176      | -2.661 (856)<br>-4.120 (856) | .007<br><.001  | No effect on association          |
| Supervisor-Supervisee relations (999)<br><i>β PhD vs. associate &amp; full prof.</i><br><i>β postdoc &amp; asis. vs. asso. &amp; full prof.</i> | 1.783      | -3.436 (557)<br>-.3062 (557) | .006<br>.002   | No effect on association          |
