# Supplementary material for: Perceptions of research integrity climate differ between academic ranks and disciplinary fields: Results from a survey among academic researchers in Amsterdam
Source: PubMed Central journal article supplement (PMC6338411; doi:10.1371/journal.pone.0210599), 2019-01-18
Supplement: pone.0210599.s006.pdf [file pone.0210599.s006.pdf]

| <b>SOUrcE Subscale (N)</b>               | <b>VIF</b> | <b>Adjusted T score<br/>(df)</b> | <b>p value</b> | <b>Effect</b>            |
|------------------------------------------|------------|----------------------------------|----------------|--------------------------|
| Regulatory Quality (670)                 | 1.835      |                                  |                |                          |
| <i>β humanities vs. biomedicine</i>      |            | -2.558 (359)                     | .011           | No effect on association |
| <i>β humanities vs. natural sciences</i> |            | -1.760 (359)                     | .079           |                          |
| <i>β humanities vs. social sciences</i>  |            | -2.314                           | .021           |                          |
| Expectations (1011)                      | 1.176      |                                  |                |                          |
| <i>β humanities vs. biomedicine</i>      |            | -3.728 (853)                     | <.001          | No effect on association |
| <i>β humanities vs. natural sciences</i> |            | -3.907 (853)                     | <.001          |                          |
